# 1 Adoption of policies to improve respectful maternity care in Timor-Leste

## 2 Short title: Policies for respectful maternity care in Timor-Leste

3  
4 Angelina da Costa Fernandes<sup>1</sup>, Stefanus Supriyanto<sup>2</sup>, Chatarina Umbul Wahyuni<sup>2</sup>, Hari Basuki  
5 Notobroto<sup>2</sup>, Alexandra Gregory<sup>3</sup>, Kayli Wild<sup>3</sup>

6  
7 <sup>1</sup> Doctoral Program of Public Health, Airlangga University, Surabaya, Indonesia

8 <sup>2</sup> School of Public Health, Airlangga University, Surabaya, Indonesia

9 <sup>3</sup> Centre for Child Development and Education, Menzies School of Health Research, Darwin, Northern  
10 Territory, Australia

11  
12 \*Corresponding author [angelina.da.costa-2019@fkm.unair.ac.id](mailto:angelina.da.costa-2019@fkm.unair.ac.id) (cc [kayli.wild@menzies.edu.au](mailto:kayli.wild@menzies.edu.au);  
13 [Stefpriyanto49@gmail.com](mailto:Stefpriyanto49@gmail.com))

## 15 Abstract

16 **Introduction:** There are now well-established global standards for supporting improvement in  
17 women's experience of maternity services, including frameworks for the prevention of mistreatment  
18 during childbirth. Given the ongoing reports from Timor-Leste outlining poor quality of care in maternal  
19 health services and the low use of health facilities for birth, we aimed to examine the adoption of global  
20 respectful maternity care standards in intrapartum care policies in Timor-Leste. **Methods:** From May to  
21 July 2022, we conducted a desk review of the Timor-Leste National Intrapartum Care Standards and  
22 Clinical Protocols for Referral Facilities and Community Health Centres. This was followed by a health-  
23 facility audit of policies, guidelines and procedures in three main maternity facilities in the capital, Dili to  
24 examine the extent to which the WHO (2016) standards for women's experiences of care have been  
25 adopted. **Results:** Despite the availability of global guidelines, key standards to improve women's  
26 experience of care have been omitted from the National Intrapartum Care guidelines in Timor-Leste.  
27 There was no mention of avoiding mistreatment of women, needing informed consent for procedures, or

28 strengthening women's own capability and confidence. In the policy wording, women tended to be  
29 distanced from the care 'procedures' and their involvement was framed around being told what to do  
30 during the birth process. The results of the health facility assessment showed extremely low use of  
31 standards that improve women's experiences of care. Health Facility 1 and 2 met two of the 21 quality  
32 measures, while Health Facility 3 met none of them. **Conclusion:** The discourse communicated through  
33 policy fundamentally affects how health care issues are framed and how policies are enacted. Given the  
34 findings of this study, combined with the widespread documentation of poor quality of care, low  
35 satisfaction with maternal health services, and emerging stories of physical and verbal abuse of women  
36 during birth, there is a need for a fundamental shift in the culture of care for women in Timor-Leste. This  
37 will require an immediate focus on leadership, training and policy-frameworks to stop mistreatment of  
38 women in health facilities. It will also require a longer-term focus on addressing the power imbalances  
39 that drive disrespect and abuse of women within and across social systems, and understanding how to  
40 support relationship-based models of care that inherently foster understanding and compassion.

41 **Keywords:** respectful care, maternal health, disrespect and abuse, obstetric violence, facility assessment,  
42 policy, audit, implementation.

## 43 **Introduction**

44 The care women receive during pregnancy, birth and in the postnatal period is intimately linked to  
45 their well-being and that of their newborn infants. Poor quality of maternal health care across the perinatal  
46 period is associated with increased risk of birth trauma [1, 2], birth and postpartum complications [3] and  
47 has flow-on effects for maternal and infant mortality [4-6]. Improving the quality of maternal healthcare is  
48 integral to women's and children's right to health, contributing to their equitable access and positive  
49 experience with health care [7].

50 Respectful maternity care is care that is organised and provided to women in a way that maintains  
51 their dignity, privacy and confidentiality, ensures freedom from harm and mistreatment, and enables

52 informed choice and continuous support during labour and birth [7]. The WHO [5] framework for quality  
53 maternal and newborn health care establishes measurable standards of care and provides a foundation for  
54 improving the quality of maternity care in health facilities. In addition to provision of care standards, the  
55 framework incorporates women's experience of care, including standards for effective communication;  
56 respect and preservation of dignity; and emotional support.

57         These standards provide important guidance for policy-makers, managers and researchers, to assess  
58 strengths and gaps in health service-systems and develop processes to improve care over time [5]. When  
59 issues central to women's experience of care are left out of health policy and facility protocols, women and  
60 families are more likely to be exposed to disrespectful, abusive and coercive behaviour by healthcare  
61 providers [8]. This can culminate in a highly traumatic experience of birth [1], feelings such as fear of  
62 childbirth [9] and avoidance of healthcare [10].

63         The woman-centred care agenda, foregrounding women's experiences of care, has gained traction  
64 globally and national health systems are starting to adopt these global standards. Despite this progress, gains  
65 can be slower in poorly resourced health systems [11]. In Timor-Leste, the quality of maternal health care  
66 has long been identified as a central health systems issue [12-15]. Maternal mortality has steadily declined  
67 since the country gained independence from Indonesia in 2002, however, only 48% of women give birth in  
68 a health facility and the steepest decline is between first birth and second birth (nationally, 63% of first  
69 births occurred in a health facility, 48% for second or third birth, 41% for fourth or fifth birth, and 35% for  
70 sixth or more) [16]. The contribution of poor quality of care toward preference for home birth has not yet  
71 been quantified, however it is likely to be a contributing factor in Timor-Leste as the National Demographic  
72 Health Survey showed 56% of women had concerns about being treated respectfully when accessing health  
73 care [16].

74         Given such prevalence of concern raised by women, and the importance of clear policies and  
75 frameworks to start addressing the issue at multiple levels [17], we examine the adoption of the WHO [5]  
76 Standards for Improving Quality of Maternal and Newborn Care in Timor-Leste. The study uses the

77 Experience of Care standards as a framework to review the national Timor-Leste Intrapartum Care  
78 Guidelines [18, 19] and perform an audit of site-specific policies and protocols at three major health  
79 facilities in the country's capital, Dili.

## 80 **Methods**

### 81 **Study design**

82 For this study we adopted a critical perspective of policy transfer [20]. The research consisted of a  
83 policy review and health facility audit, based on the WHO [5] Standards for Improving Quality of Maternal  
84 and Newborn Care in Health Facilities. This study was part of larger program of research being undertaken  
85 by author AF, on women's experiences of disrespect and abuse during childbirth in Dili (initial qualitative  
86 study, survey with women on prevalence of mistreatment, and this policy assessment). In this way, the  
87 findings presented here are part of a broader assessment on provision and experience of respectful care, to  
88 inform gaps and ways forward for policy and practice in Timor-Leste.

### 89 **Sampling technique**

90 The study was conducted in the capital city, Dili, as this municipality has the highest proportion of  
91 facility-based births (83% of births in a health facility, compared with 48% nationally) [16]. Dili also  
92 contains the largest referral hospital in the country as well as six community health centres providing  
93 primary health care and birthing services. Three health facilities were sampled based on the highest number  
94 of births per month. The facilities have been de-identified and are denoted as Health Facility 1, 2 and 3.

### 95 **Ethical approval and permission**

96 Ethical clearance was obtained from the Ethical Review Committee at Airlangga University,  
97 Indonesia (ID# 071/HRECC.FODM/III/2022). Reciprocal approval was obtained from Timor-Leste's  
98 Human Ethics Committee at the National Institute for Health (INS – *Instituto Nasional Saude*) in Dili (ID#  
99 603MS-INS/GDE/IV/2022). At each of the study sites, the health facility or maternity department manager

100 was contacted, the research explained and a letter of approval from INS was provided. The study was also  
101 approved through the ethics department of the larger study facility.

## 102 **Policy review**

103 Deductive content analysis was used to compare the extent to which the concepts in the WHO [5]  
104 Standards and Quality Statements (4-6 on experiences of care) had been incorporated into the Timor-Leste  
105 National Intrapartum Standards of Care and Clinical Protocols [18, 19]. The national policies were first  
106 read and reviewed as a whole, then a word search was performed to further identify specific concepts and  
107 how they were framed within the documents.

## 108 **Health facility audit**

109 An audit tool (Table 2-7) was derived from the WHO [5] Standards 4-6 on Experiences of Care. These  
110 included the Input Quality Measures for:

- 111 • Standard 4 on Effective Communication: 4.1 All women and their families receive information about  
112 the care and have effective interactions with staff.
- 113 • Standard 5 on Respect and Preservation of Dignity: 5.1 All women and newborns have privacy around  
114 the time of labour and childbirth, and their confidentiality is respected; 5.2 No woman or newborn is  
115 subjected to mistreatment, such as physical, sexual or verbal abuse, discrimination, neglect, detainment,  
116 extortion or denial of services; 5.3 All women can make informed choices about the services they  
117 receive, and the reasons for interventions or outcomes are clearly explained.
- 118 • Standard 6 on Emotional Support: 6.1 Every woman is offered the option to experience labour and  
119 childbirth with the companion of her choice; 6.2 Every woman receives support to strengthen her  
120 capability during childbirth.

121 The 'Input Quality Measures' for each of these standards was developed into a table, with a tick-box  
122 column to indicate whether the criteria were present or not at each facility (Table 2-7). The wording for  
123 each quality measure was adapted for the context of Timor-Leste through rephrasing for clarity, and then

124 translated to Indonesian as the research is being undertaken at an Indonesian University. For example, WHO  
125 Standard 4.1 '*Easily understood health education materials, in an accessible written or pictorial format,*  
126 *are available in the languages of the communities served by the health facility*' was rephrased as '*Health*  
127 *education materials are available in Tetum, with easily accessible writing or pictures, and are given by*  
128 *midwives to birthing women*'. Some input measures were omitted if they were not applicable to the Timor-  
129 Leste context, for example standards referring to detainment for non-payment, as Timor-Leste has a free  
130 public healthcare system.

131 At each study facility a department manager was contacted, the research was explained and a time was  
132 made to visit the service. Interviews were conducted from May to July 2022. Written informed consent was  
133 provided by the participant and they were interviewed by AF in the local language, Tetun, to assess whether  
134 each of the input criteria were met. Item responses consisted of "Yes", meaning the health facility had the  
135 policy, guideline or equipment in place, or "No" meaning it did not exist at the time of the interview. Where  
136 policy was only somewhat compliant with the standard, participants were probed for further comment until  
137 consensus was reached.

## 138 **Results**

### 139 **Adoption of WHO standards in national intrapartum care policies**

140 The review of the Timor-Leste national intrapartum Standards of Care and Clinical Protocols for  
141 Community Health Centres [18] and Referral Facilities [19] showed that the WHO Experience of Care  
142 Standards were only marginally adopted. The Timor-Leste guidelines briefly referenced supportive care, in  
143 the form of four dot points in the whole document [18]. These tended to be general statements, without  
144 specific actions or directions on how to achieve them. For example, with regard to effective communication,  
145 the only reference in the protocols was a dot point stating 'Communication with patient and family about  
146 progress and problems and management'. For respect and preservation of dignity, there was one dot point  
147 in the document stating 'Respect for clients (respect during care and discussions and maintain privacy

148 during examinations)'. Within this concept of respect, there was no mention of not mistreating women or  
149 newborns, and no mention of avoiding physical, sexual or verbal abuse, discrimination, neglect, detainment,  
150 extortion or denial of services. Similarly, there was no mention of informed choice, consent or that reasons  
151 for interventions or outcomes should be clearly explained. For emotional support there was one dot point  
152 stating '**If requested**, allow one accompanying person of women's choice in labour room' (author emphasis  
153 added). There were no statements around strengthening a woman's own capability and confidence during  
154 childbirth. Overall, any reference to supportive care in the national protocols was very sparse (total of four  
155 dot points) and the wording of these points was very general (i.e. Comfort: physical and emotional). It is  
156 worth noting that the way birthing women were positioned in the policy wording tends to remove them as  
157 active agents in the birth process, and fails to address women's social and emotional wellbeing and their  
158 right to choice.

## 159 **Health facility assessment**

160 The findings of the health facility assessment show all of the sampled facilities scored low on  
161 quality measures for Experiences of Care (Table 1). Health Facility 1 and 2 had the highest score, meeting  
162 two of the 21 criteria, while Health Facility 3 met none of them. Following is a breakdown of challenges  
163 within each domain.

164 **Table 1. Number (%) of Experience of Care quality measures met at each study facility.**

| Experience of care quality measures | Number (%) of quality measures met |                   |                   |
|-------------------------------------|------------------------------------|-------------------|-------------------|
|                                     | Health Facility 1                  | Health Facility 2 | Health Facility 3 |
| Effective communication             | 0/4 (0%)                           | 0/4 (0%)          | 0/4 (0%)          |
| Privacy and confidentiality         | 1/2 (50%)                          | 1/2 (50%)         | 0/2 (0%)          |
| Avoid mistreatment                  | 0/5 (0%)                           | 0/5 (0%)          | 0/5 (0%)          |
| Informed consent                    | 0/3 (0%)                           | 0/3 (0%)          | 0/3 (0%)          |
| Companion of choice                 | 1/4 (25%)                          | 1/4 (25%)         | 0/4 (0%)          |
| Strengthen women's capability       | 0/3 (0%)                           | 0/3 (0%)          | 0/3 (0%)          |
| Total                               | 2/21 (10%)                         | 2/21 (10%)        | 0/21 (0%)         |

165

## 166 **Effective communication**

167           None of the WHO recommended standards for supporting effective communication between  
168 women and their care providers were in place in any of the surveyed health facilities (Table 2). There were  
169 no birth education materials for women (for example pain management, relaxation, how to push during  
170 labour), and there were no specific policies in place to promote midwives' communication and counselling  
171 skills. Only one of the health facilities had received in-service training on interpersonal communication  
172 (provided by INS). However, it was not provided regularly and they did not received follow-up training or  
173 support. The main communication issues identified by the interview participants were midwives not  
174 introducing themselves to women, not involving women in choices about what actions were taken during  
175 their labour and birth and not providing opportunities to discuss women's concerns. There were also no  
176 induction or supervision mechanisms to support midwives' communication and counselling skills.

177 **Table 2. Quality measures for Effective Communication.**

| No | Quality measures                                                                                                                                                                                                | Health facility 1 | Health facility 2 | Health facility 3 |
|----|-----------------------------------------------------------------------------------------------------------------------------------------------------------------------------------------------------------------|-------------------|-------------------|-------------------|
| 1  | Health education materials are available in Tetum, with easily accessible writing or pictures, and are given by midwives to birthing women.                                                                     | No                | No                | No                |
| 2  | Midwives are oriented and receive in-service training at least once every 12 months to improve communication and interpersonal counselling skills according to local culture.                                   | No                | No                | No                |
| 3  | The maternity department has a written, up-to-date policy that outlines clear goals, operational plans and monitoring mechanisms to promote the interpersonal communication and counselling skills of midwives. | No                | No                | No                |
| 4  | Midwives in the maternity unit receive supportive supervision in interpersonal communication, counselling and cultural competence every three months.                                                           | No                | No                | No                |



## 178 **Privacy and confidentiality**

179 Health facility 1 and 2 had a separate room for birth, but it was small (3 x 4 meters). There were  
180 sometimes difficulties fitting people in the room, especially when students were observing. The third health  
181 facility had two beds in the ‘delivery’ room. This was a problem when two women were giving birth, and  
182 the companion of the other birthing woman could either see and overhear, or would be asked to leave the  
183 room. There was also lack of space and privacy for women in labour, who often had to stay on the postnatal  
184 ward (large shared room) due to lack of space. When curtains and partitions were present, they were not  
185 always used by the health providers, and curtains provide no sound protection. In addition, there were no  
186 written protocols to guide staff on the importance of or how to promote privacy and confidentiality (Table  
187 3).

188 **Table 3. Quality measures for Privacy and Confidentiality.**

| No | Quality measures                                                                                                                                                                             | Health facility 1 | Health facility 2 | Health facility 3 |
|----|----------------------------------------------------------------------------------------------------------------------------------------------------------------------------------------------|-------------------|-------------------|-------------------|
| 1  | The physical environment of the health facility allows for privacy and respectful, confidential care, including the availability of curtains, screens, partitions and adequate bed capacity. | Yes               | Yes               | No                |
| 2  | The health facility has written and up-to-date protocols to ensure privacy and confidentiality for all women during birth.                                                                   | No                | No                | No                |

189

## 190 **Avoid mistreatment**

191 There were no policies outlining the need to avoid mistreatment of women, accountability  
192 mechanisms, or the rights of women to make complaints (Table 4). Although there was a complaints box  
193 at one of the health facilities, there was no mechanism to check or review it, and it was empty during the  
194 time of the interview. Participants at all facilities said their midwifery staff had not received in-service  
195 training or supportive supervision about avoiding mistreatment or respecting women’s rights.

196 **Table 4. Quality measures to ensure no woman is subjected to Mistreatment.**

| No | Quality measures                                                                                                                                                                                                                | Health facility 1 | Health facility 2 | Health facility 3 |
|----|---------------------------------------------------------------------------------------------------------------------------------------------------------------------------------------------------------------------------------|-------------------|-------------------|-------------------|
| 1  | The health facility has written, up-to-date, zero-tolerance non-discriminatory policies with regard to the mistreatment of women in the maternity ward.                                                                         | No                | No                | No                |
| 2  | The health facility has a written accountability mechanism in the event of mistreatment or violence                                                                                                                             | No                | No                | No                |
| 3  | The health facility has up-to-date written policies and protocols outlining the rights of women to make complaints about the care received and has an easily accessible mechanism (eg, comments box) for submitting complaints. | No                | No                | No                |
| 4  | Midwives receive in-service training and supportive supervision in respecting the rights of women, and providing respectful care. Orientation is given to new staff.                                                            | No                | No                | No                |
| 5  | The health facility has a complaints box, which is easily accessible to women and their families, which is periodically emptied and the contents reviewed.                                                                      | No                | No                | No                |

197

## 198 **Informed consent**

199 There were no written policies outlining the need to obtain women’s informed consent before  
200 examinations or procedures such as episiotomy, vaginal examination, or perineal suturing (Table 5). While  
201 there was a consent procedure to perform cesarean section, there were no standard consent forms available  
202 and a lack of process around seeking consent for other procedures such as vaginal examination and  
203 episiotomy. In addition, participants reported that their midwifery staff had not received in-service training  
204 or supportive supervision on informed consent procedures or women’s right to choose their care.

205 **Table 5. Quality measures for Informed Choice.**

| No | Quality measures                                                                                                                     | Health facility 1 | Health facility 2 | Health facility 3 |
|----|--------------------------------------------------------------------------------------------------------------------------------------|-------------------|-------------------|-------------------|
| 1  | The health facility has a written and up-to-date policy for obtaining the consent of the woman prior to examinations and procedures. | No                | No                | No                |

|   |                                                                                                                                                                                          |    |    |    |
|---|------------------------------------------------------------------------------------------------------------------------------------------------------------------------------------------|----|----|----|
| 2 | Health facilities have standard informed consent forms that help midwives provide women with easy-to-understand information to obtain full consent before taking action                  | No | No | No |
| 3 | Midwives in the maternity unit receive in-service training and supportive supervision in informed consent and women’s right to choose their care. Orientation is provided for new staff. | No | No | No |

206

## 207 **Companion of choice**

208           There were no written protocols that encouraged women to have a companion of choice during  
 209 labour, birth or post-partum (Table 6). One participant said their staff often asked women if they would like  
 210 a family member to accompany them. The shared birthing room in one of the health facilities was  
 211 particularly problematic for male birth companions, who were not allowed to enter the room when there  
 212 was more than one woman using the space. Midwives in the study facilities had not been provided with in-  
 213 service training on the positive impact of labour companion, and there was no information to orient  
 214 companions on their role in supporting women during birth.

215 **Table 6. Quality measures for Companion of Choice.**

| No | Quality measures                                                                                                                                                                                                                                                               | Health facility 1 | Health facility 2 | Health facility 3 |
|----|--------------------------------------------------------------------------------------------------------------------------------------------------------------------------------------------------------------------------------------------------------------------------------|-------------------|-------------------|-------------------|
| 1  | The labour and childbirth areas are organized in such a way as to allow a physical private space for the woman and her companion at the time of birth.                                                                                                                         | Yes               | Yes               | No                |
| 2  | The health facility has a written, up-to-date protocol, which is explained to women and their families, to encourage all women to have at least one person of their choice, as culturally appropriate, with them during labour, childbirth and the immediate postnatal period. | No                | No                | No                |
| 3  | Midwives in the health facility are oriented and receive in-service refresher training sessions at least once every 12 months on the evidence for and positive impact of the presence of a chosen companion during labour and birth.                                           | No                | No                | No                |
| 4  | Orientation sessions and information (written or pictorial) are available to orient the companion on his or her role in supporting the woman during labour and birth.                                                                                                          | No                | No                | No                |

## 216 **Strengthen women's capability**

217 Interview participants said that their midwives had not been oriented to use of pharmacological or  
218 non-pharmacological pain relief, nor in strengthening their interpersonal communication in providing  
219 emotional support, and had not received in-service training in relation to these. There were no protocols to  
220 minimise unnecessary interventions or strengthen a woman's own capability during birth (Table 7).

221 **Table 7. Quality measures to Strengthen Women's Capability.**

| No | Quality measures                                                                                                                                                                                                                                                          | Health facility 1 | Health facility 2 | Health facility 3 |
|----|---------------------------------------------------------------------------------------------------------------------------------------------------------------------------------------------------------------------------------------------------------------------------|-------------------|-------------------|-------------------|
| 1  | Midwives in the labour and childbirth areas of the maternity unit were oriented in nonpharmacological and pharmacological pain relief and received in-service training or sessions at least once in the preceding 12 months.                                              | No                | No                | No                |
| 2  | The health facility has a written, up-to-date protocol, which is explained to women and their families, to minimise unnecessary interventions, support normal labour and strengthen the woman's capability, so that she feels in control of her childbirth experience.    | No                | No                | No                |
| 3  | Midwives in the labour and childbirth areas of the maternity unit were oriented and received in-service training or refresher sessions at least once in the preceding 12 months to strengthen their interpersonal and cultural competence in providing emotional support. | No                | No                | No                |

222

## 223 **Discussion**

224 Despite availability of global guidelines to support respectful maternity care and prevent  
225 mistreatment of women during childbirth [5, 7, 21, 22], this study found that key standards to improve  
226 women's experience of care have been omitted from the national intrapartum care guidelines in Timor-  
227 Leste [18, 19]. Most significantly, there was no mention of avoiding mistreatment of women, needing  
228 informed consent for procedures, or strengthening women's own capability and confidence. Given the  
229 failure to acknowledge women's experience of care within national policy, it is not surprising that the

230 audited health facilities met so few of the Experience of Care standards. Health Facility 1 and 2 had the  
231 highest score, meeting two of the 21 quality measures, while Health Facility 3 met none of them. Without  
232 policies that prioritise respectful woman-centred care, women are at risk of disrespect directly as a result of  
233 harmful policies [23], or indirectly as a result of lack of guidance, oversight and procedural consequence  
234 for neglectful or harmful practice [11, 24].

235           Qualitative research on women’s experience of mistreatment, conducted by the authors in the same  
236 audited health facilities, revealed that women were subjected to frequent physical and verbal abuse by their  
237 birth attendant [25]. This included hitting her, forcing her thighs open, stitching her perineum without pain  
238 relief, shouting and being angry, and humiliating her. The abuse was most severe in the second stage of  
239 labour, during the intense pain of birth, and when the birth attendant perceived the woman was not following  
240 their instructions [25].

241           The discourse communicated through policy, the tone and wording within documents,  
242 fundamentally affects how health care issues are framed and how policies are enacted [26]. In the national  
243 intra-partum care guidelines [18, 19] women were distanced from the care ‘procedures’, their views and  
244 wishes were rarely mentioned, and their involvement was limited to being directed on what to do during  
245 the birth process. The lack of attention given to respectful care in maternal health policy, in combination  
246 with the authoritative discourse within the guidelines, mirrors the broader gender inequality and  
247 disempowerment of women in Timorese society [27]. Given the high rates of family violence in Timor-  
248 Leste (35% experienced violence from their partner in the past 12 months), in combination with the high  
249 fertility rate of 4.2 births per woman [16], there is likely to be substantial intersections of abuse and trauma  
250 for women, repeated in multiple settings and over multiple births.

251           Policy improvements are fundamental to practice improvements, as adequate policies, procedures  
252 and accountability mechanisms are linked to behaviour of health care providers, with flow on effects for  
253 improved birth experiences and better outcomes for women and families [8]. In addition to policy guidance,  
254 calls for improvements in training and supportive supervision are echoed across existing literature [2, 8, 21,

255 28-31]. Training should include confronting the normalisation of violence against women within families  
256 and across systems, the belief that mistreatment is necessary to minimise clinical harm, reflection on our  
257 own psychological and emotional responses in various scenarios [32] and strategies that encouraged  
258 introspection and cultural humility [33].

259         There is an immediate need for greater awareness, training and policy frameworks in Timor-Leste  
260 that directly address how to stop mistreating women. Evidence suggests, however, that simply having  
261 policies and training is not enough, as health systems interact with structural inequality and individual  
262 interpersonal dynamics to underpin the disrespect and abuse of women [34]. Key organisational factors  
263 such as high workload, low pay, resource shortages, and lack of professional autonomy and supervision  
264 and feedback mechanisms have been identified as contributing factors that need to be addressed at a systems  
265 level [35]. The WHO [21] has long argued that ending disrespect and abuse during childbirth must be  
266 approached comprehensively. This has been reinforced in recent reviews of strategies to prevent  
267 mistreatment, in that they emphasise the need to address the power-related drivers of mistreatment across  
268 the ecological model (i.e. intrapersonal, interpersonal, community, organizational, and law/policy) [36], as  
269 well as transforming institutional leadership and approaches to supervision that tackle existing power  
270 hierarchies [35]. Given the findings in of this study, combined with the widespread documentation of poor  
271 quality of care, low satisfaction with maternal health services, and emerging stories of physical and verbal  
272 abuse of women during birth in Timor-Leste [12-16, 25, 37], there is a need for an urgent and fundamental  
273 shift in the culture of care for women, a shift that needs to be based on the diverse experiences of birthing  
274 women in Timor, and their vision of what better models of maternity care would look like across the  
275 country.

## 276 **Conclusion**

277         Lack of policy frameworks that prioritise women's experiences of care hinders the ability to  
278 implement respectful ways of working with women in maternal health services. The National Intrapartum

279 Care guidelines in Timor-Leste are not woman-centered, and minimize women's autonomy, their right to  
280 choice and freedom from violence. Further exploration is required to understand the lack of priority given  
281 to addressing harm at the highest level of policy, and to promote national leadership in this area. Given the  
282 dearth of research on interventions and models that increase respectful care and reduce mistreatment, this  
283 is a priority area for further research and maternity care reform in Timor-Leste.

## 284 **Acknowledgements**

285 Thank you to the research participants and department heads who gave their permission to  
286 participate in this study. This research was funded through AF's PhD scholarship by Airlangga  
287 University, Indonesia and Instituto Superior Cristal, Timor-Leste.

## 288 **References**

- 289 1. Reed, R., R. Sharman, and C. Inglis, Women's descriptions of childbirth trauma relating to care  
290 provider actions and interactions. *BMC pregnancy and childbirth*, 2017. 17: p. 1-10.
- 291 2. Mannava, P., et al., Attitudes and behaviours of maternal health care providers in interactions  
292 with clients: a systematic review. *Globalization and health*, 2015. 11: p. 1-17.
- 293 3. Forssén, A.S., Lifelong significance of disempowering experiences in prenatal and maternity  
294 care: interviews with elderly Swedish women. *Qualitative Health Research*, 2012. 22(11): p.  
295 1535-1546.
- 296 4. Raven, J.H., et al., What is quality in maternal and neonatal health care? *Midwifery*, 2012. 28(5):  
297 p. e676-83.
- 298 5. WHO, Standards for improving quality of maternal and newborn care in health facilities. 2016.
- 299 6. Wong, P.C. and P. Kitsantas, A review of maternal mortality and quality of care in the USA. *The*  
300 *Journal of Maternal-Fetal & Neonatal Medicine*, 2020. 33(19): p. 3355-3367.
- 301 7. WHO, WHO recommendation on respectful maternity care during labour and childbirth. Geneva:  
302 The WHO Reproductive Health Library, 2018.
- 303 8. Hernández-Martínez, A., et al., Women's perceptions of living a traumatic childbirth experience  
304 and factors related to a birth experience. *International journal of environmental research and*  
305 *public health*, 2019. 16(9): p. 1654.
- 306 9. Lukasse, M., et al., Prevalence of experienced abuse in healthcare and associated obstetric  
307 characteristics in six European countries. *Acta Obstetrica et Gynecologica Scandinavica*, 2015.  
308 94(5): p. 508-517.
- 309 10. Schroll, A.-M., H. Kjærgaard, and J. Midtgaard, Encountering abuse in health care; lifetime  
310 experiences in postnatal women - a qualitative study. *BMC Pregnancy and Childbirth*, 2013.  
311 13(1): p. 74.
- 312 11. Miller, S., et al., Beyond too little, too late and too much, too soon: a pathway towards evidence-  
313 based, respectful maternity care worldwide. *The Lancet*, 2016. 388(10056): p. 2176-2192.



- 314 12. Khorshed, M.S., et al., Factors Affecting Quality of Care in Maternal and Child Health in Timor-  
315 Leste: A Scoping Review. *Health Services Insights*, 2022. 15: p. 11786329221110052.
- 316 13. King, R. and L. Jones, Key factors deterring women's engagement with skilled birth attendants in  
317 three districts of Timor—Leste. A qualitative descriptive study. *Midwifery*, 2019. 79: p. 102555.
- 318 14. Price, J.A., et al., “I go I die, I stay I die, better to stay and die in my house”: understanding the  
319 barriers to accessing health care in Timor-Leste. *BMC Health Services Research*, 2016. 16(1): p.  
320 1-15.
- 321 15. Wild, K., et al., Birth choices in Timor-Leste: a framework for understanding the use of maternal  
322 health services in low resource settings. *Social science & medicine*, 2010. 71(11): p. 2038-2045.
- 323 16. General Directorate of Statistics and ICF, Timor-Leste Demographic and Health Survey 2016:  
324 Key Indicators, Ministry of Finance, Editor. 2017, GDS: Dili.
- 325 17. Freedman, L.P., et al., Defining disrespect and abuse of women in childbirth: a research, policy  
326 and rights agenda. *Bulletin of the World Health Organization*, 2014. 92: p. 915-917.
- 327 18. Ministry of Health, Standards of Care and (Intrapartum) Clinical Protocols Referral Facilities  
328 Timor-Leste, Ministry of Health, Editor. 2017a, Ministry of Health: Dili.
- 329 19. Ministry of Health, Standards of Care and (Intrapartum) Clinical Protocols for Community Health  
330 Centre (CHC) Timor-Leste, Ministry of Health, Editor. 2017b, Ministry of Health: Dili.
- 331 20. Evans, M., Policy transfer in critical perspective. *Policy studies*, 2009. 30(3): p. 243-268.
- 332 21. WHO, The prevention and elimination of disrespect and abuse during facility-based childbirth:  
333 WHO statement. 2014, World Health Organization.
- 334 22. WHO, WHO recommendations on maternal and newborn care for a positive postnatal experience.  
335 2022: World Health Organization.
- 336 23. Mayra, K., Z. Matthews, and S.S. Padmadas, Why do some health care providers disrespect and  
337 abuse women during childbirth in India? *Women and Birth*, 2022. 35(1): p. e49-e59.
- 338 24. Austin, A., et al., Approaches to improve the quality of maternal and newborn health care: an  
339 overview of the evidence. *Reproductive Health*, 2014. 11(S2): p. S1.
- 340 25. Fernandes, A., S. Suprianto, and K. Wild. A Qualitative Study of Physical and Verbal Abuse  
341 Experienced by Women during Labor and Childbirth in Dili Municipality, Timor-Leste. in 8th  
342 International Conference on Public Health 2021. 2021. Sebelas Maret University.
- 343 26. Cicchetti, D., Annual Research Review: Resilient functioning in maltreated children - past,  
344 present, and future perspectives. *Journal of Child Psychology and Psychiatry*, 2013. 54(4): p. 402-  
345 422.
- 346 27. Wild, K., et al., Harmonia-Communities ending gender-based violence. *Gender Equality and  
347 Social Inclusion (GESI) Analysis*. 2021.
- 348 28. Tsakmakis, P.L., S. Akter, and M.A. Bohren, A qualitative exploration of women's and their  
349 partners' experiences of birth trauma in Australia, utilising critical feminist theory. *Women Birth*,  
350 2023. 36(4): p. 367-376.
- 351 29. Sudhinaraset, M., et al., Providers and women's perspectives on person-centered maternity care: a  
352 mixed methods study in Kenya. *International journal for equity in health*, 2019. 18(1): p. 1-15.
- 353 30. Lazzarini, M., et al., Use of WHO standards to improve quality of maternal and newborn hospital  
354 care: a study collecting both mothers' and staff perspective in a tertiary care hospital in Italy.  
355 *BMJ Open Quality*, 2019. 8(1): p. e000525.
- 356 31. Ukke, G.G., M.K. Gurara, and W.G. Boynito, Disrespect and abuse of women during childbirth  
357 in public health facilities in Arba Minch town, south Ethiopia—a cross-sectional study. *PloS one*,  
358 2019. 14(4): p. e0205545.
- 359 32. Downe, S., et al., Theories for interventions to reduce physical and verbal abuse: A mixed  
360 methods review of the health and social care literature to inform future maternity care. *PLOS  
361 global public health*, 2023. 3(4): p. e0001594.
- 362 33. Bohren, M.A., et al., Strategies to reduce stigma and discrimination in sexual and reproductive  
363 healthcare settings: A mixed-methods systematic review. *PLOS Global Public Health*, 2022. 2(6):  
364 p. e0000582.



- 365 34. Bradley, S., et al., Disrespectful intrapartum care during facility-based delivery in sub-Saharan  
366 Africa: A qualitative systematic review and thematic synthesis of women's perceptions and  
367 experiences. *Social Science & Medicine*, 2016. 169: p. 157-170.
- 368 35. Reddy, B., et al., A scoping review of the impact of organisational factors on providers and  
369 related interventions in LMICs: Implications for respectful maternity care. *PLOS Global Public  
370 Health*, 2022. 2(10): p. e0001134.
- 371 36. Schaaf, M., et al., A critical interpretive synthesis of power and mistreatment of women in  
372 maternity care. *PLOS Global Public Health*, 2023. 3(1): p. e0000616.
- 373 37. Wallace, H.J., et al., The decision to seek care antenatally and during labour and birth – Who and  
374 what influences this in Timor-Leste? A qualitative project exploring the perceptions of Timorese  
375 women and men. *Midwifery*, 2018. 65: p. 35-42.
